# Supplementary material for: Nitrogen-Doped CuO@CuS Core-Shell Structure for Highly Efficient catalytic OER Application
Source: Preprints.org preprint supplement (doi:10.20944/preprints202311.0890.v1), 2023-11-14
Supplement: Supplementary file 1 [file supplementary]

# Nitrogen-Doped CuO@CuS Core-Shell Structure for Highly Efficient catalytic OER Application

Abu Talha Aqueel Ahmed <sup>1</sup>, Abu Saad Ansari <sup>2</sup>, Vijaya Gopalan Sree <sup>1</sup>, Atanu Jana <sup>1</sup>, Abhishek Meena <sup>1</sup>, Sankar Sekar <sup>1,3</sup>, Sangeun Cho <sup>1</sup>, Hyungsang Kim <sup>1</sup>, Hyunsik Im <sup>1\*</sup>

<sup>1</sup> Division of Physics and Semiconductor Science, Dongguk University, Seoul 04620, Republic of Korea; talha-phy@gmail.com, sreevg@dgu.ac.kr, atanujanaic@gmail.com, pakar.abhishek@gmail.com, sangeun.c@dongguk.edu, hskim@dongguk.edu, hyunsik7@dongguk.edu

<sup>2</sup> Center of Excellence Applied Nanotechnology, Nano Center Indonesia Research Institute, Banten 15314, Indonesia; abusaadphy@gmail.com,

<sup>3</sup> Quantum-Functional Semiconductor Research Center, Dongguk University-Seoul, Seoul 04620, Korea; sanssekar@gmail.com

\* Correspondence: hyunsik7@dongguk.edu; Tel.: +82 2 2260 3770

## Supporting Figures

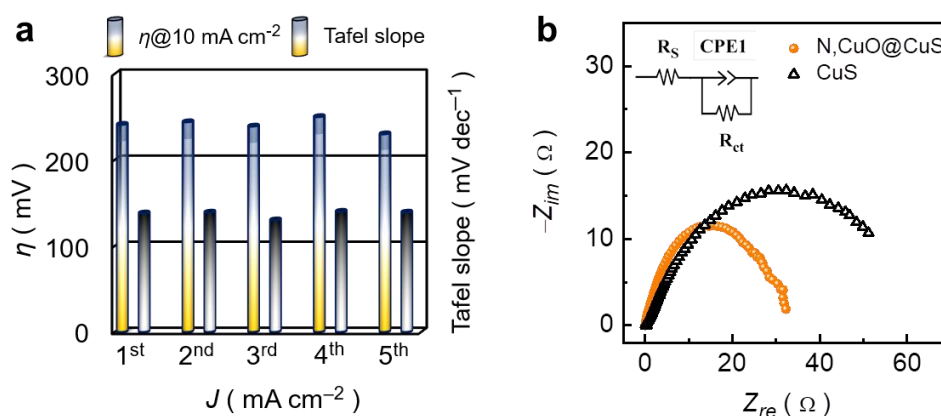

**Figure S1.** (a) Reliability of the OER activity for the N,CuO@CuS core-shell structure catalyst. (b) Nyquist impedance plots for CuS and N,CuO@CuS catalyst.

**Citation:** To be added by editorial staff during production.

Academic Editor: Firstname Last-name

Received: date

Revised: date

Accepted: date

Published: date

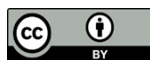

**Copyright:** © 2023 by the authors. Submitted for possible open access publication under the terms and conditions of the Creative Commons Attribution (CC BY) license (<https://creativecommons.org/licenses/by/4.0/>).

Nyquist impedance curves (EIS plots) were recorded to help understand the fundamental electron transfer kinetics of the CuS and N,CuO@CuS core-shell structure catalysts. Figure S1b shows the Nyquist impedance curves for both catalysts along with the tank circuit that was used to fit the semicircle curves (i.e., charge transfer resistance;  $R_{ct}$ ). The point at which the semicircles meet the X-axis illustrates the internal resistance of the electrodes (i.e.,  $R_s$ ). This resistance encompasses both the substrate's intrinsic resistance and the electrolyte resistance within the electrochemical system. The N,CuO@CuS possesses a smaller  $R_{ct}$  curve compared to pure CuS catalyst, indicating that the conductivity of the catalyst material has increased after nitrogen treatment.

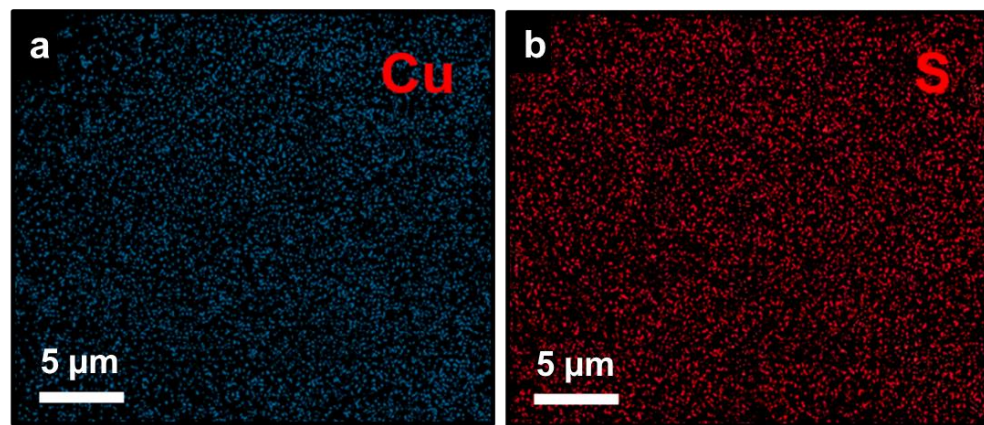

**Figure S2.** (a) Cu and (b) S constituents EDS image mapping for the pure CuS electrode film.

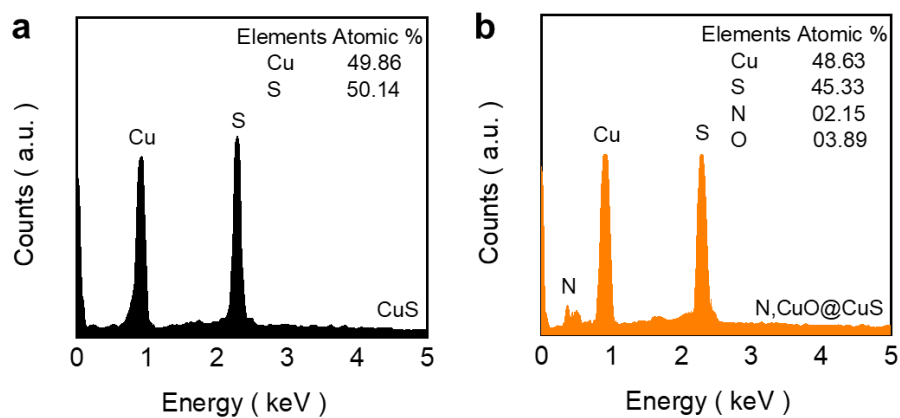

**Figure S3.** EDS spectra for the (a) CuS and (b) N,CuO@CuS electrode films.

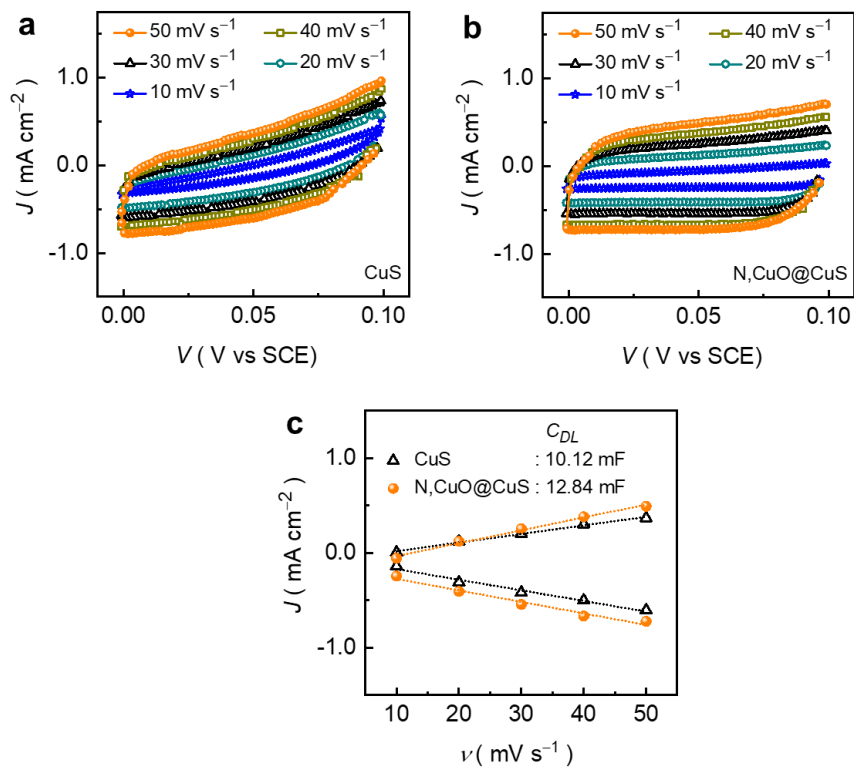

**Figure S4.** Non-Faradaic CV curves for (a) CuS and (b) N,CuO@CuS catalyst measured at various scan rates. (c) “ $J$  versus  $\nu$ ” plots obtained at 0.05 V from non-Faradaic CV curves for the estimation of double-layer capacitance and ECSA.
